# Supplementary material
Source: PubMed Central journal article supplement (PMC4995115)
Supplement: NIHMS771932-supplement-1.pdf [file NIHMS771932-supplement-1.pdf]

## SUPPLEMENTARY DATA

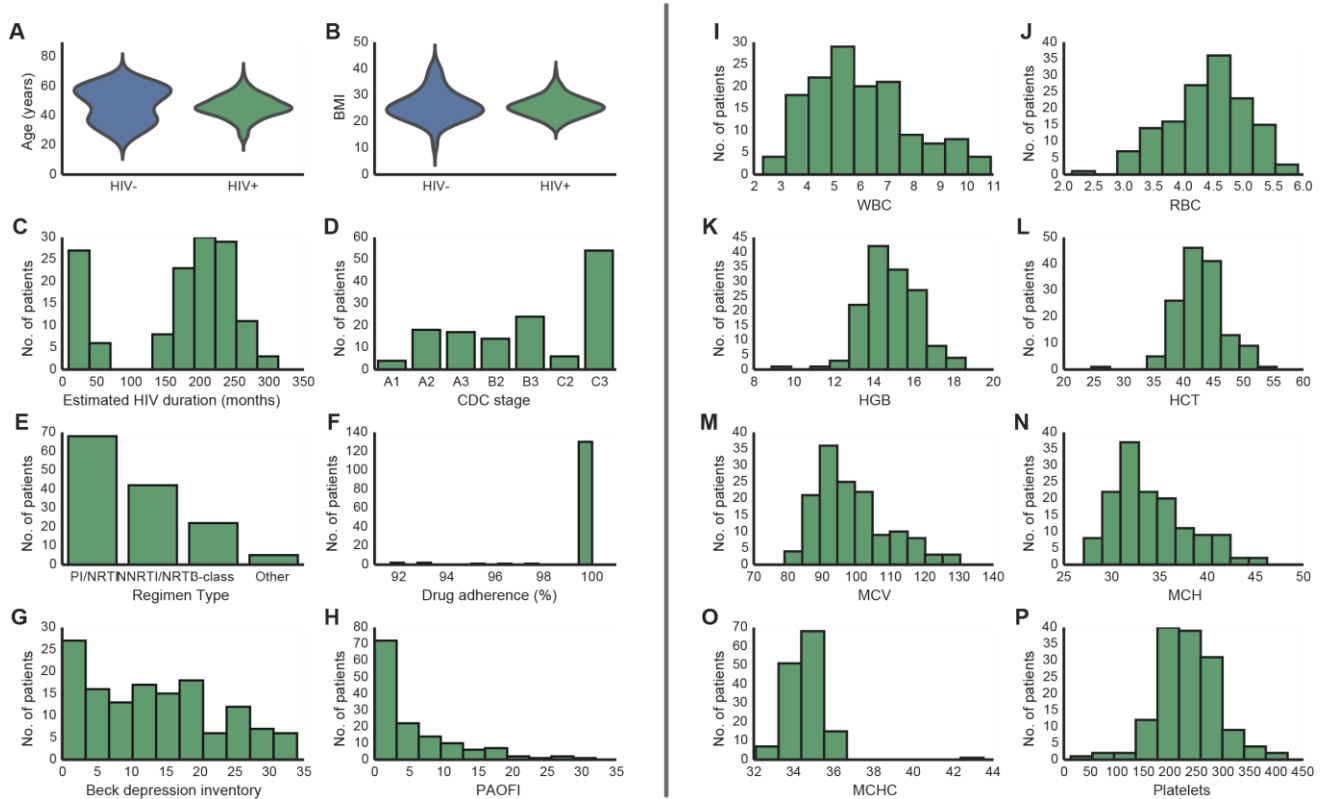

**Figure S1. Clinical variables and blood-based biomarkers collected for the primary cohort, related to Experimental Procedures.** **A-B**, Comparison of age and body mass index (BMI) across 137 cases and 42 control patients. **C-H**, Clinical variables collected from HIV-infected patients at the time of sample collection. HIV staging was based on standards of the Centers for Disease Control (CDC). Regime types indicate 2-class (PI, protease inhibitor; NRTI, nucleoside reverse-transcriptase inhibitor; NNRTI, non-nucleoside reverse-transcriptase inhibitor); 3-class, (PI/NRTI/NNRTI); PAOFI, patient's assessment of own functioning inventory. **I-P**, Complete blood counts from HIV-infected patients. WBC, white blood cell count; RBC, red blood cell count; HGB, hemoglobin; HCT, hematocrit; MCV, mean corpuscular volume; MCH, mean corpuscular hemoglobin; MCHC, mean corpuscular hemoglobin concentration. For further characterization of HIV patients see **Table S1**.

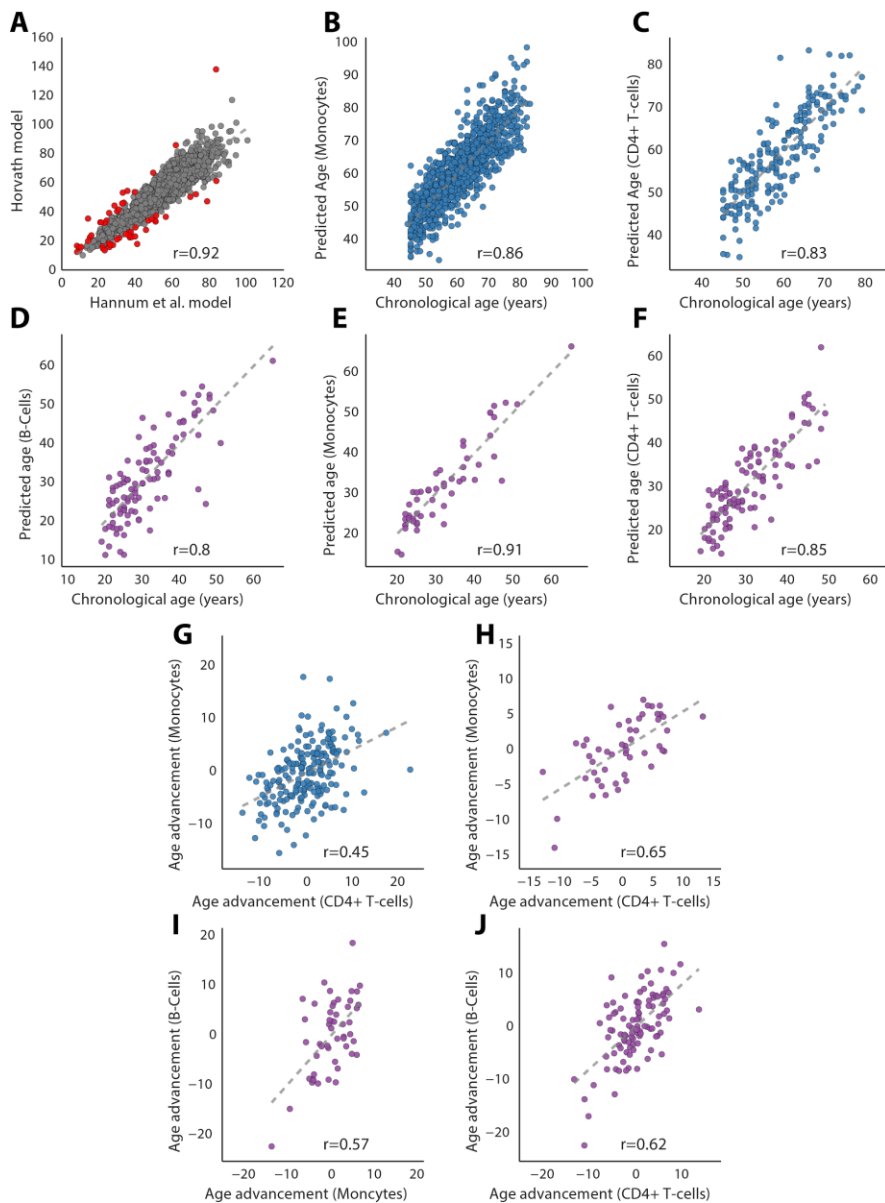

**Figure S2. Evaluation of epigenetic age predictions in sorted cell datasets, related to Figure 3.** **A**, Scatter plot comparing the ages predicted using the Hannum *et al.* and Horvath models on 1688 samples obtained from sorted cell datasets. Red points indicate patients that were discarded due to disagreement between the two aging models ( $n=54$ ). **B-C** Accuracy of the consensus model (y-axis) to predict true chronological age (x-axis) in sorted cell datasets from Reynolds *et al.* ( $n=1130$  and  $201$  for monocytes and CD4+ T-cells, respectively). **D-F**, Accuracy of the consensus model (y-axis) to predict true chronological age (x-axis) in sorted cell datasets from Absher *et al.* ( $n=54$ ,  $103$ , and  $102$  for monocytes, B cells, and CD4+ T-cells, respectively). **G-H**, Scatter plots comparing age advancement in patient matched samples for Reynolds *et al.* (**G**) and Absher *et al.* (**H-J**).

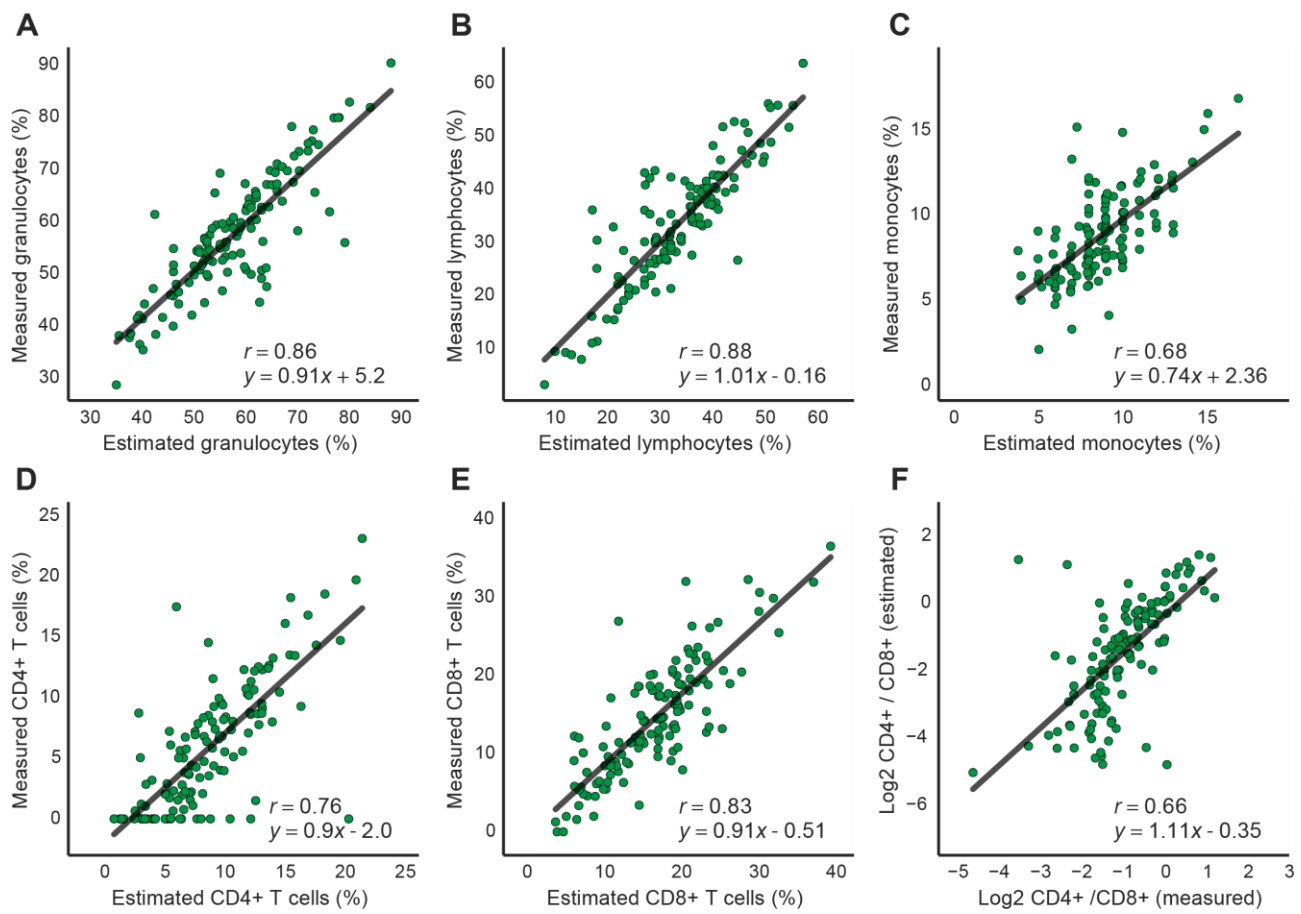

**Figure S3. Concordance of estimated cell counts with lab measured values in HIV-infected patients, related to Experimental Procedures.** Percentages of each cell type (A-F) were estimated using the Jaffe and Irizarry method. Black lines indicate regression.

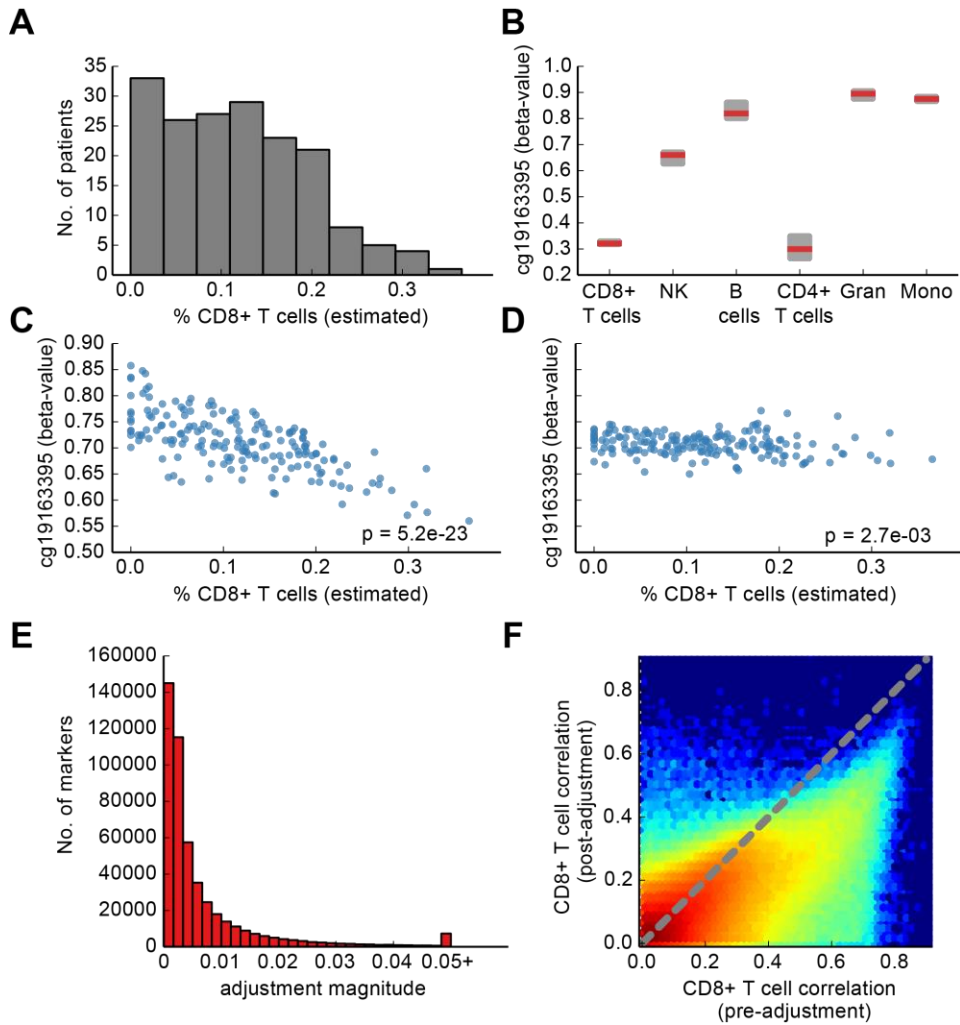

**Figure S4. Summary of cell composition adjustment procedure, related to Experimental Procedures.** **A**, Distribution of estimated CD8+ T cell composition across the primary patient cohort (Methods). **B**, Distribution of CpG methylation fraction for marker cg19163395 across flow sorted blood populations for six individuals obtained from the Houseman *et al.* dataset. NK, Natural Killer cells; Gran, Granulocytes; Mono, Monocytes. **C-D**, Association of cg19163395 methylation fraction *versus* CD8+ T cell abundance in unadjusted (**C**) and adjusted (**D**) data. **E**, Distribution of the standard deviation of magnitude adjustment across the primary cohort for each marker measured. **F**, Hex-bin plot showing correlation of marker methylation levels (logit-adjusted beta values) with CD8+ T cell abundance before and after cell composition adjustment.

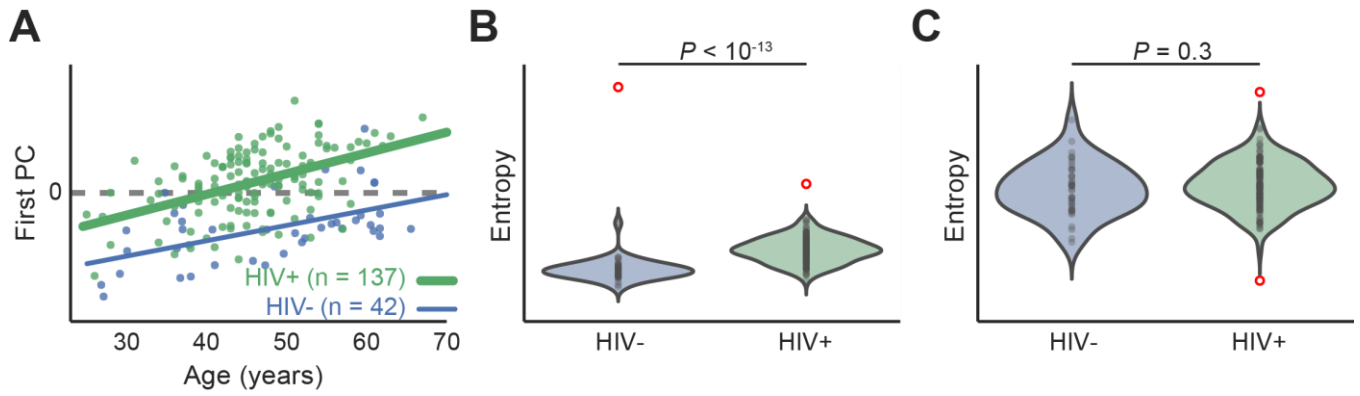

**Figure S5. Observed disorder (entropy) in different sets of CpG markers, related to Experimental Procedures.** **A**, First principal component (PC) of 7967 age associated markers that trend away from disorder across HIV-infected patients (green) and healthy controls (blue, **Experimental Methods**). **B**, Relative entropy comparing HIV+ to HIV- individuals across the 473,044 markers passing quality control. **C**, Relative entropy comparing HIV+ to HIV- individuals across 436 markers used at least one of the epigenetic models of aging. Significance assessed by Mann-Whitney U test. Note that red circles indicate outliers  $\pm 3$  standard deviations away from the mean. These are not used to fit the violin profile, but are used in the statistical assessment.

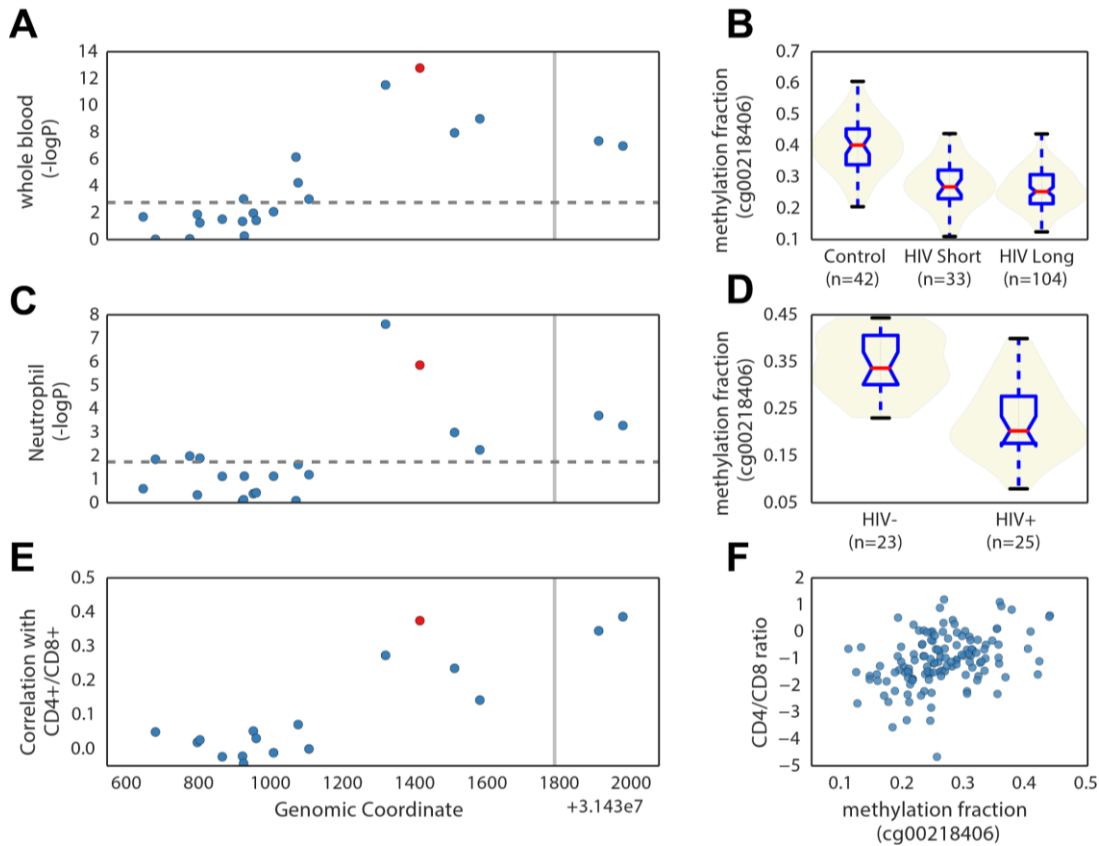

**Figure S6. Exploration of methylation markers annotated to HCP5, related to Figure 5. A,** Log p-values for association of methylation with HIV infection in primary whole blood samples. **B,** Violin plots showing the distribution of methylation values for cg0028406, the most HIV-associated marker in this region. **C,** Log p-values for association of methylation with HIV infection in the purified neutrophil samples. **D,** Violin plots showing the distribution of methylation values for cg0028406. **E,** Correlation of methylation values with CD4+/CD8+ T-cell ratio among HIV+ subjects. **F,** Scatter plot of CD4+/CD8+ T-cell ratio versus cg0028406 methylation levels. Vertical line corresponds to rs2395029, a SNP having major association with HIV host control. Red points in left-hand plots represent cg0028406, the probe profiled in the right-hand plots.

**Table S1. Clinical information and meta-data for HIV+ patients and HIV– controls; related to Experimental Procedures. (separate Excel file).**

**Table S2. Markers associated with age and HIV status; related to Figure 1, Figure 4, and Figure 5 (separate Excel file).**

**Table S3. Multivariate linear model comparing age and HIV with the first principal component of age-associated methylation probes, related to Figure 1.**

|                  | coef    | std err | t      | P>  t    | 95.0% Conf. Int. |
|------------------|---------|---------|--------|----------|------------------|
| <b>Intercept</b> | 0.2209  | 0.026   | 8.482  | 8.78e-15 | 0.169 0.272      |
| <b>age</b>       | -0.0032 | 0.001   | -6.275 | 2.64e-09 | -0.004 -0.002    |
| <b>HIV</b>       | -0.0948 | 0.010   | -9.075 | 2.25e-16 | -0.115 -0.074    |

R-squared: 0.389

Adjusted R-squared: 0.382

**Table S4. Performance of different aging models in healthy subjects used in this study, related to Figure 2.**

| Dataset                   | EPIC |      |       |      | Hannum <i>et al.</i> |      |       |       | Primary Cohort |      |       |      |
|---------------------------|------|------|-------|------|----------------------|------|-------|-------|----------------|------|-------|------|
|                           | n    | r    | Error |      | n                    | r    | Error |       | n              | r    | Error |      |
| Yrs                       |      |      | %     | Yrs  |                      |      | %     | Yrs   |                |      | %     |      |
| Hannum <i>et al.</i>      | 662  | 0.82 | 3.69  | 6.88 | 538                  | 0.87 | 4.19  | 8.33  | 42             | 0.92 | 3.77  | 8.79 |
| Horvath                   | 662  | 0.75 | 4.64  | 8.79 | 538                  | 0.82 | 5.14  | 10.07 | 42             | 0.91 | 3.74  | 8.76 |
| Consensus                 | 662  | 0.82 | 3.69  | 6.89 | 538                  | 0.87 | 4.12  | 8.06  | 42             | 0.93 | 3.49  | 8.27 |
| Consensus (Data filtered) | 637  | 0.82 | 3.65  | 6.79 | 497                  | 0.86 | 4.06  | 7.81  | 40             | 0.94 | 3.30  | 7.60 |

*n*, number of samples; *r*, Pearson’s correlation coefficient; Error (Yrs): Mean absolute prediction error in years; Error (%): Average prediction error scaled by age magnitude.

**Table S5. Clinical information and meta-data for HIV+ patients and HIV– controls in sorted cell validation datasets; related to Experimental Procedures (separate Excel file).**

**Table S6. Overlap of age and HIV-associated markers within specific genomic contexts, related to Figure 4.**

|                    | <b>Odds Ratio</b> | <b>p-value</b> |
|--------------------|-------------------|----------------|
| <b>All Markers</b> | 1.29              | 3.88e-59       |
| <b>Promoter</b>    | 1.22              | 2.50e-08       |
| <b>Gene Body</b>   | 1.24              | 4.04e-13       |
| <b>TSS</b>         | 1.33              | 2.57e-26       |
| <b>DHS Site</b>    | 1.46              | 8.45e-29       |
| <b>Enhancer</b>    | 1.46              | 1.73e-26       |
| <b>PRC2</b>        | 1.68              | 3.32e-81       |
| <b>CpG Island</b>  | 1.70              | 9.32e-110      |
